# Supplementary material
Source: PubMed Central journal article supplement (PMC8857055)
Supplement: NIHMS1771851-supplement-1771851_Sup_Fig_1.pdf [file NIHMS1771851-supplement-1771851_Sup_Fig_1.pdf]

# Gel source data for Fig. 1b,c, with crop regions marked.

EGF stimulation (Fig. 1b)

Left panels include markers. Right panels are same gels, with longer exposure (excluding markers)

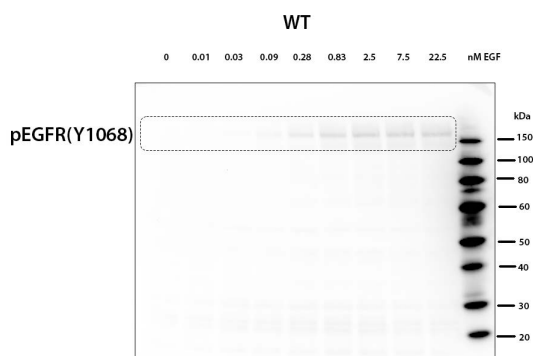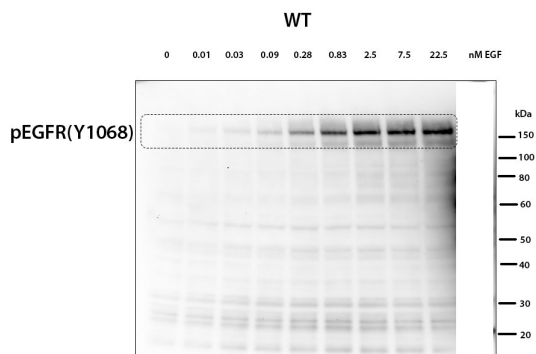

Figure 1b (top)

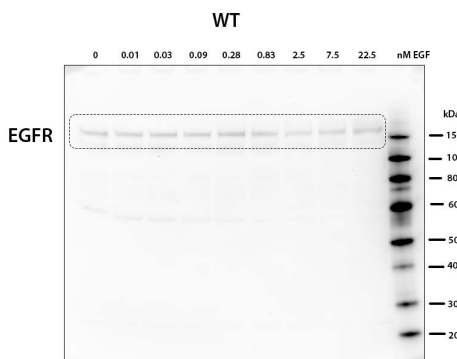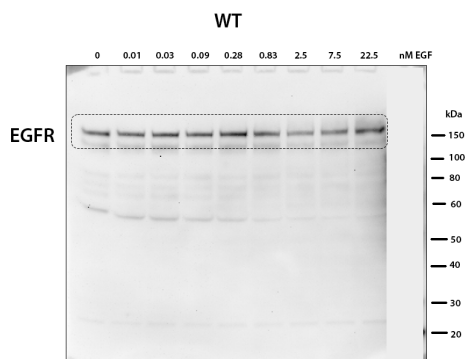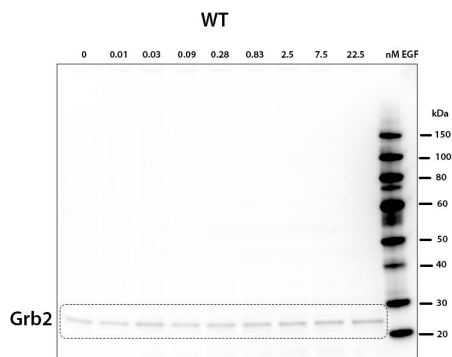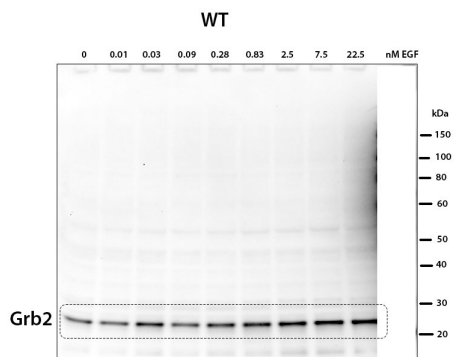

Grb2 sample processing control (parallel gels)

# EGF stimulation (Fig. 1b)

Left panels include markers. Right panels are same gels with longer exposure (excluding markers)

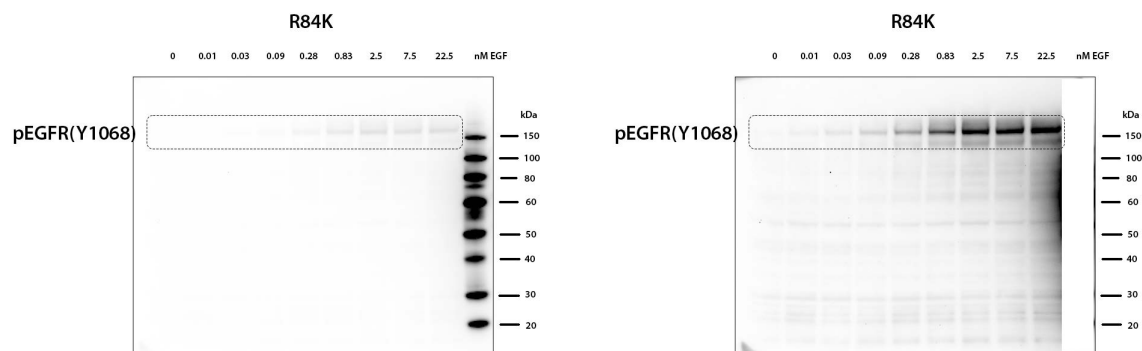

Figure 1b (2nd top)

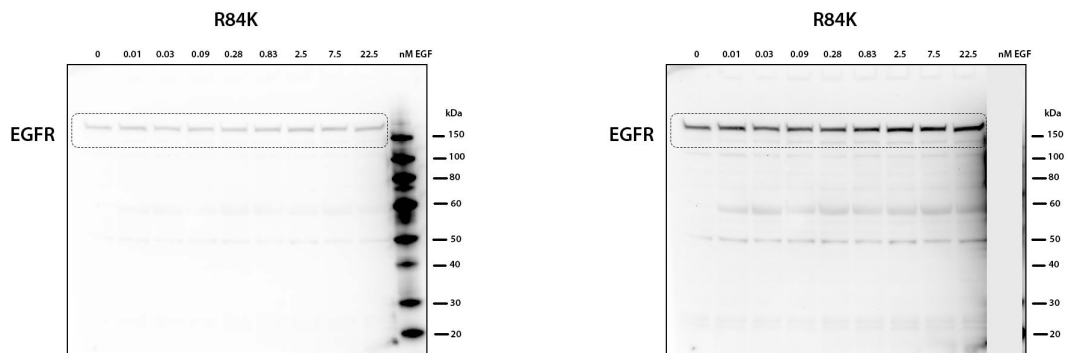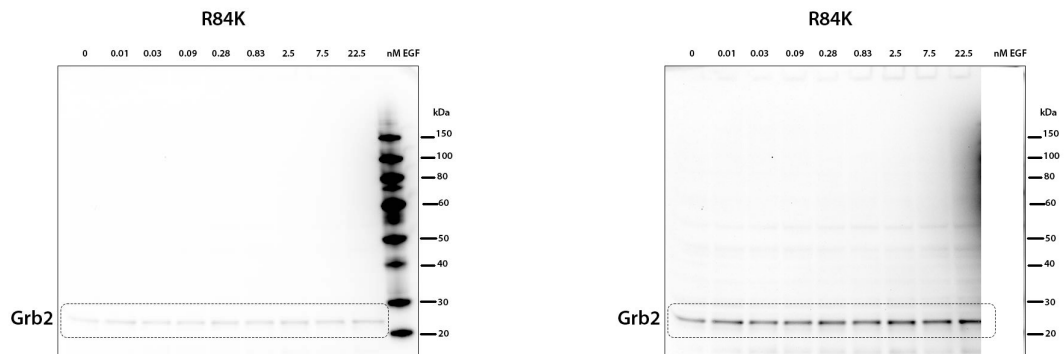

Grb2 sample processing control (parallel gels)

# EGF stimulation (Fig. 1b)

Left panels include markers. Right panels are same gels with longer exposure (excluding markers)

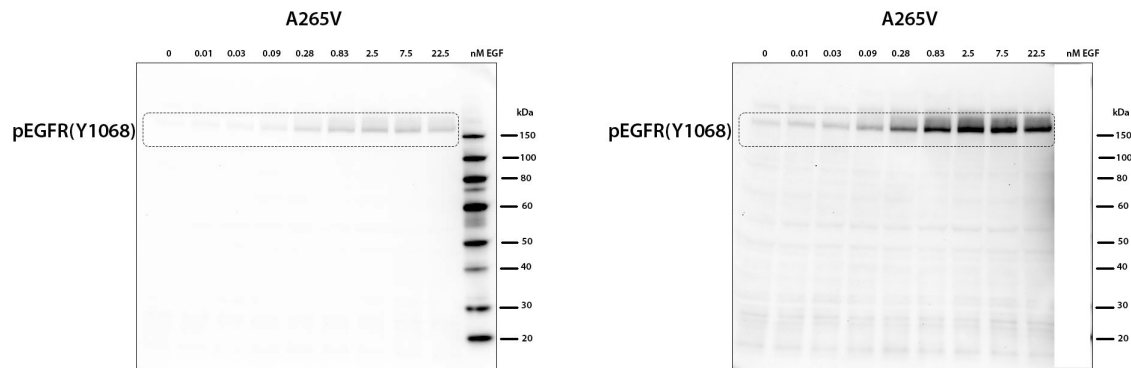

Figure 1b (bottom)

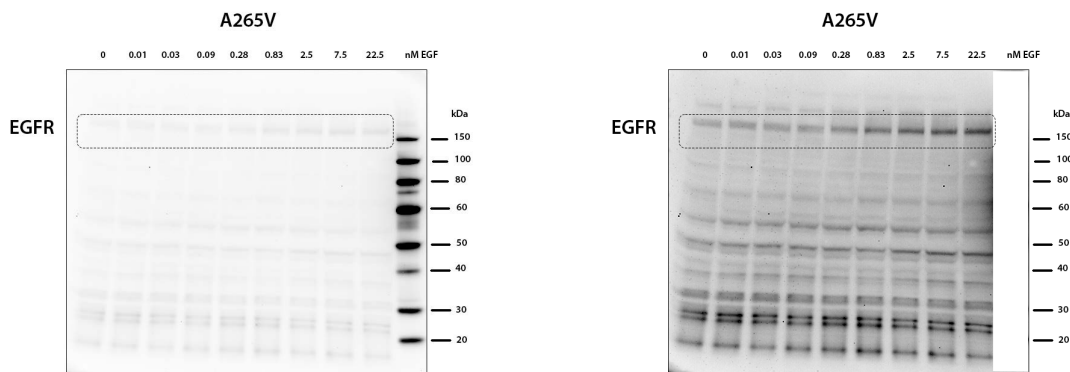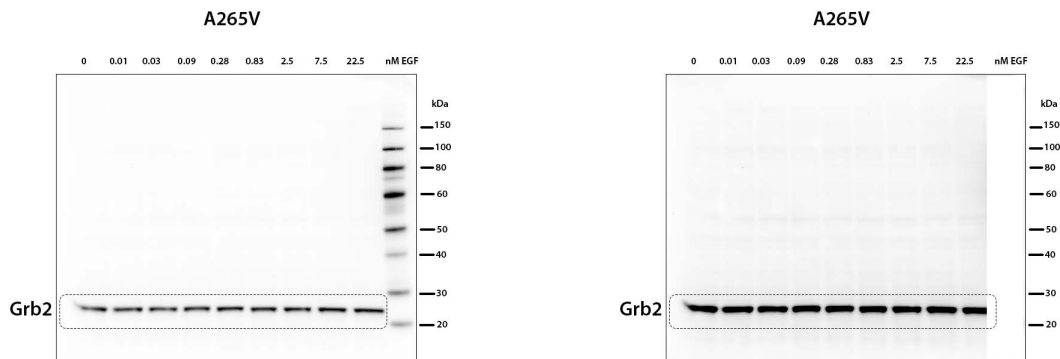

Grb2 sample processing control (parallel gels)

# EREG stimulation (Fig. 1c)

Left panels include markers. Right panels are same gels with longer exposure (excluding markers)

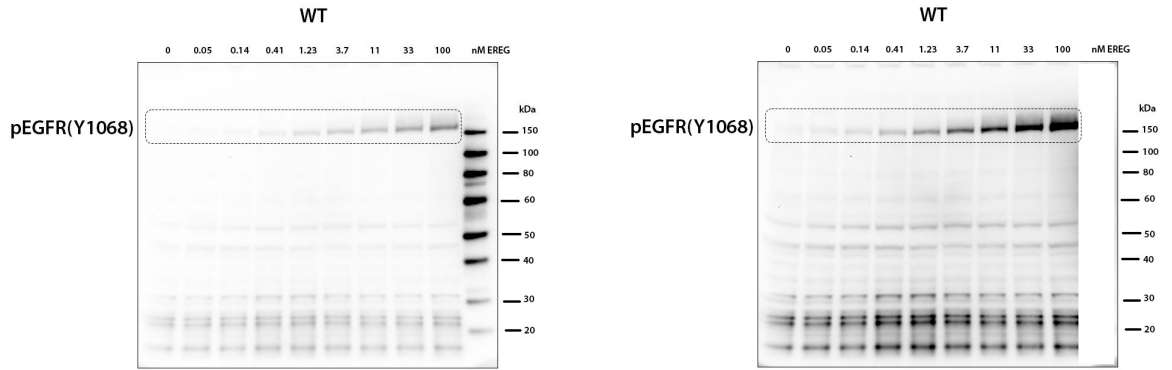

Figure 1c (top)

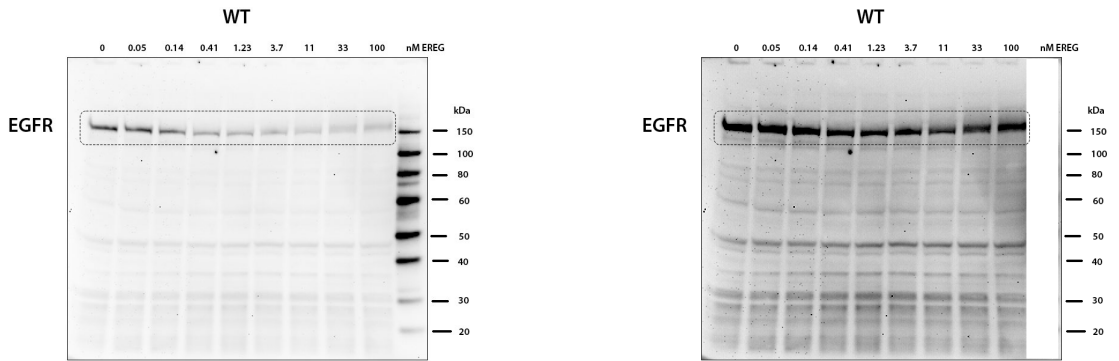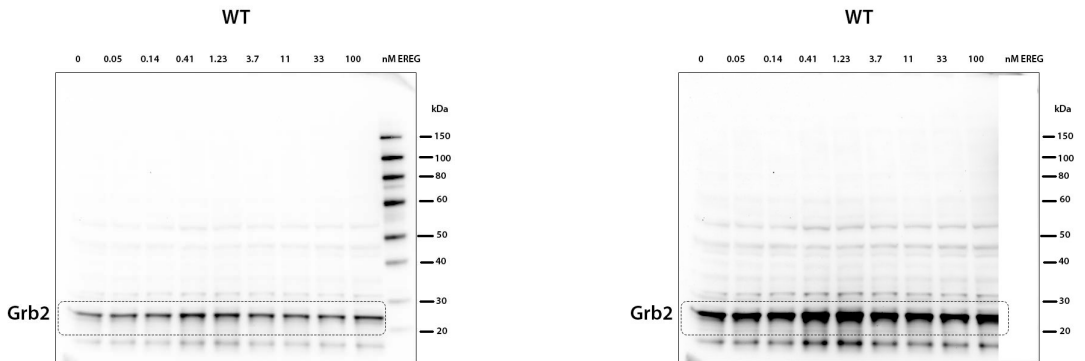

Grb2 sample processing control (parallel gels)

# EREG stimulation (Fig. 1c)

Left panels include markers. Right panels are same gels with longer exposure (excluding markers)

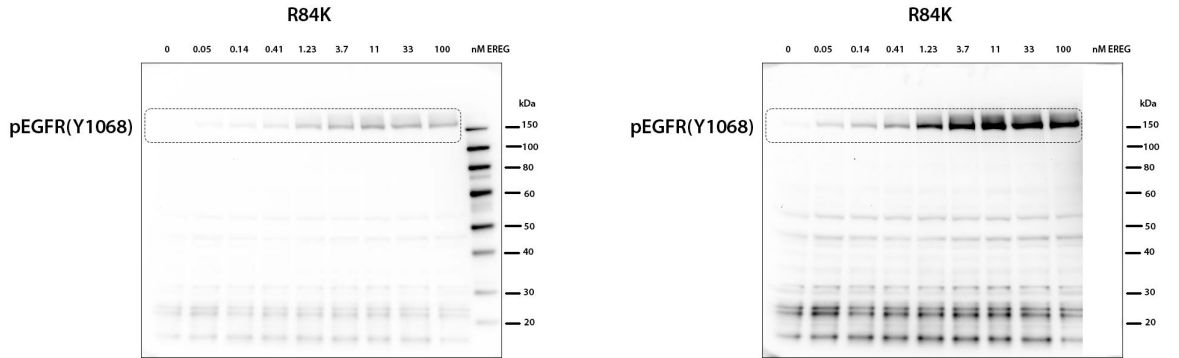

Figure 1c (2nd top)

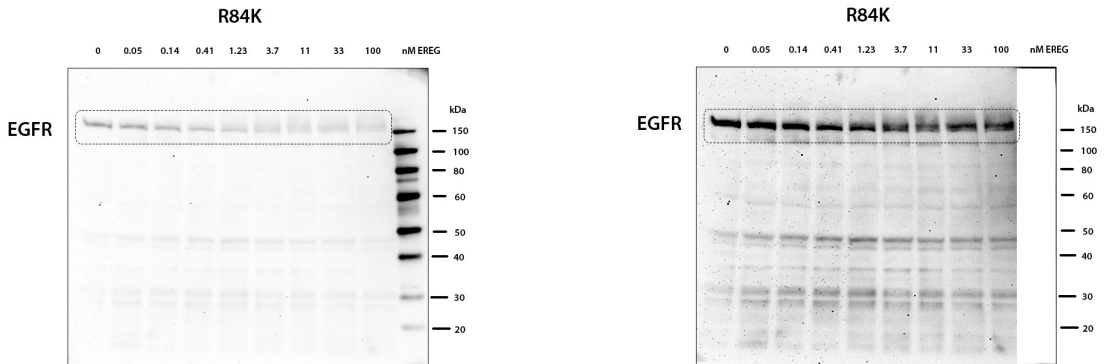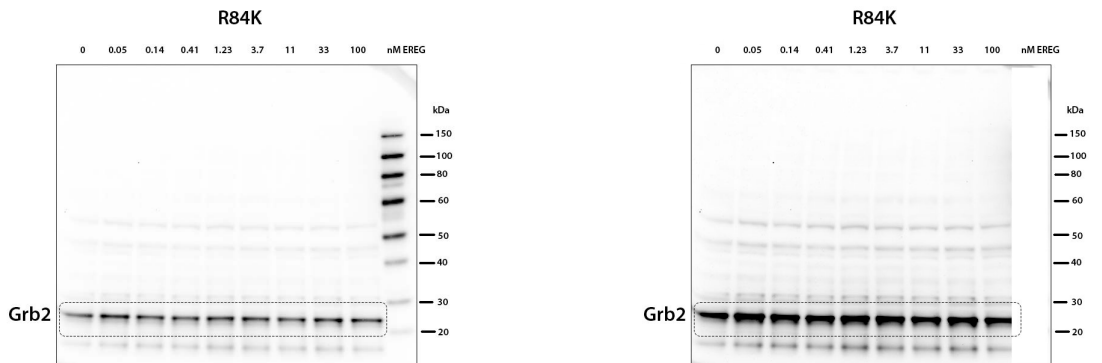

Grb2 sample processing control (parallel gels)

# EREG stimulation (Fig. 1c)

Left panels include markers. Right panels are same gels with longer exposure (excluding markers)

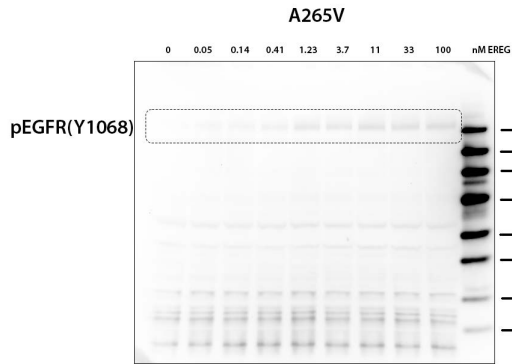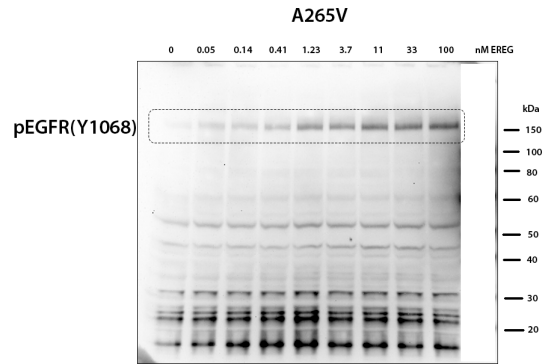

Figure 1c (bottom)

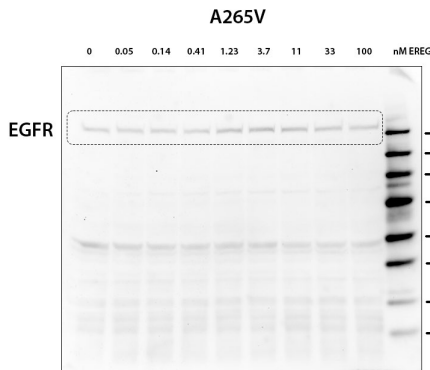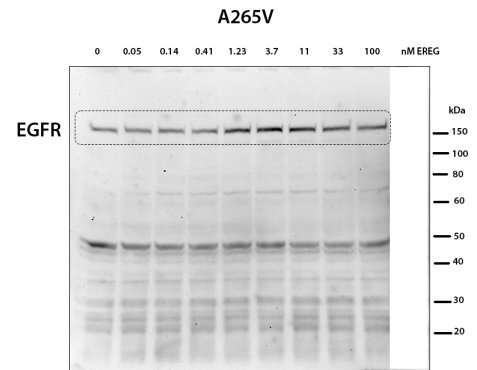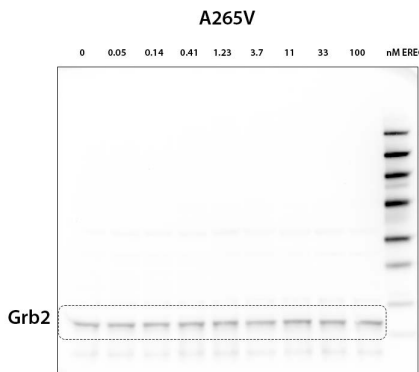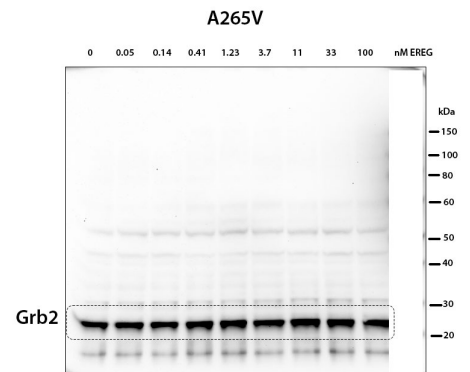

Grb2 sample processing control (parallel gels)

Gel source data for Coomassie Stained gels in Figure 2 and Extended Data Figure 2

Figure 2f

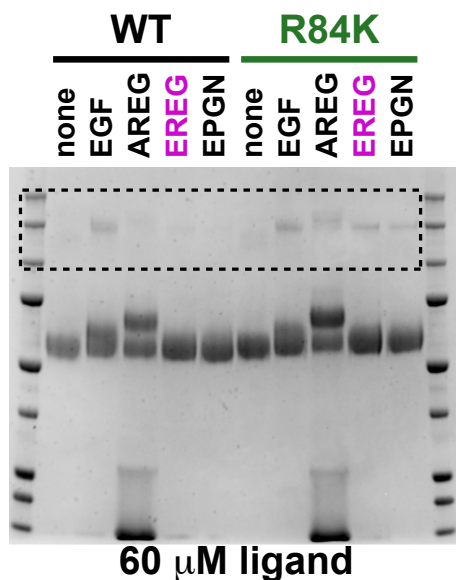

Extended Data Figure 2

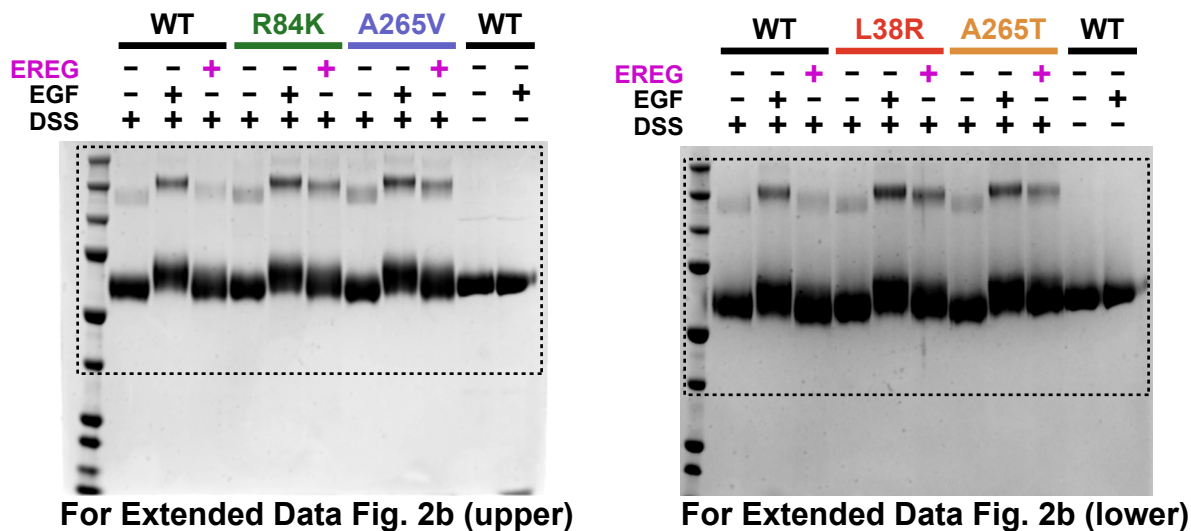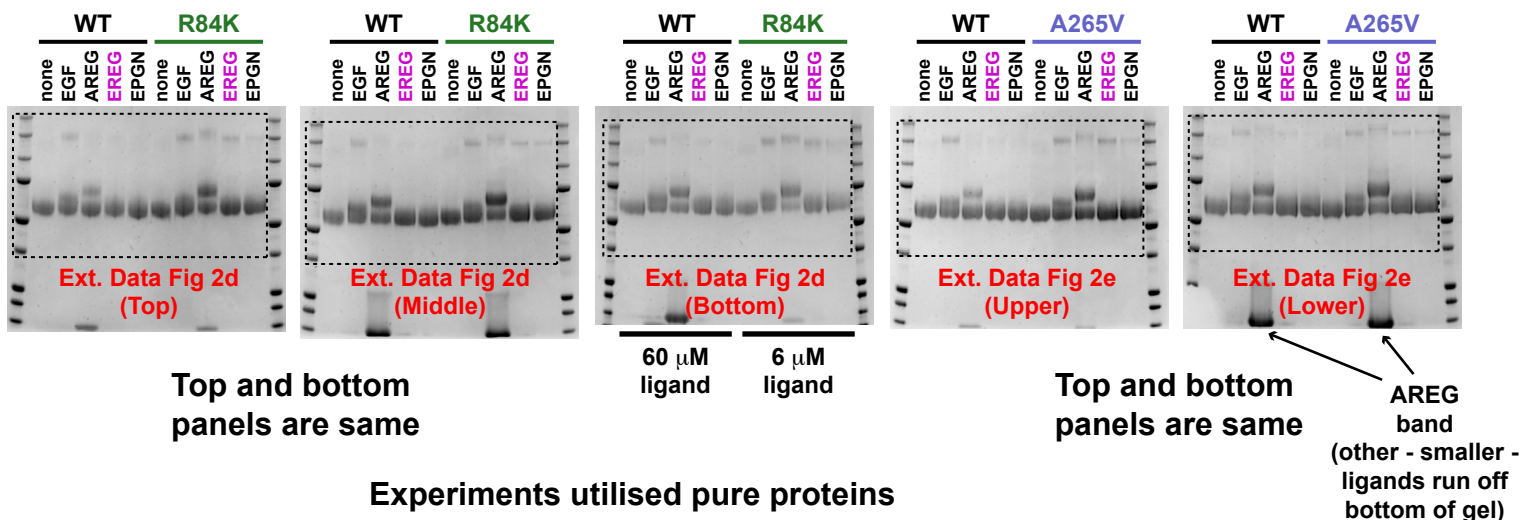

# Gel source data for Extended Data Fig. 1a

Left and right are different exposures: left with markers, right excluding markers (for detection range). Boxes represent cropped areas.

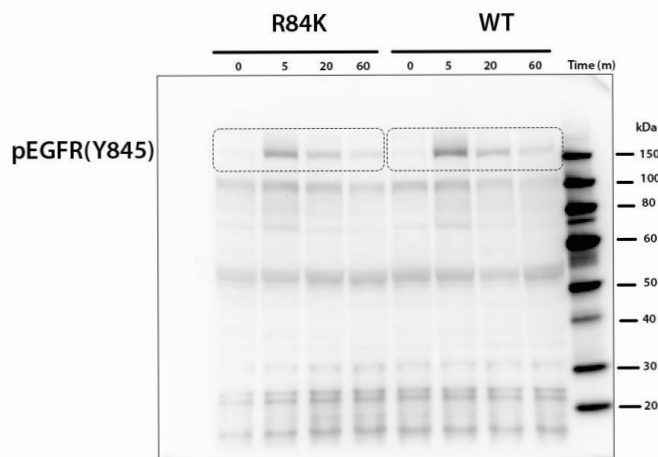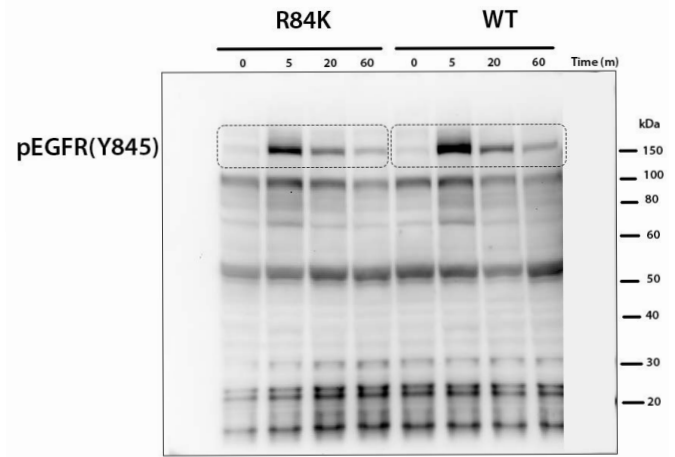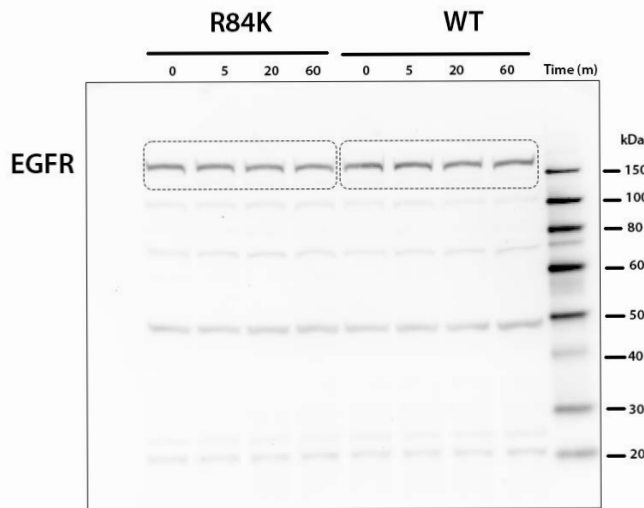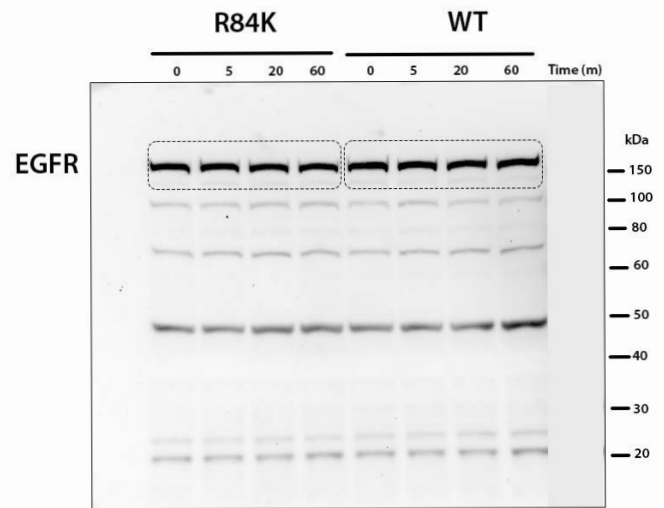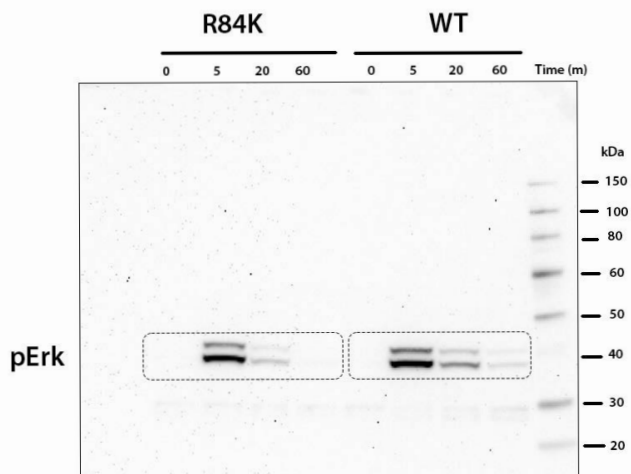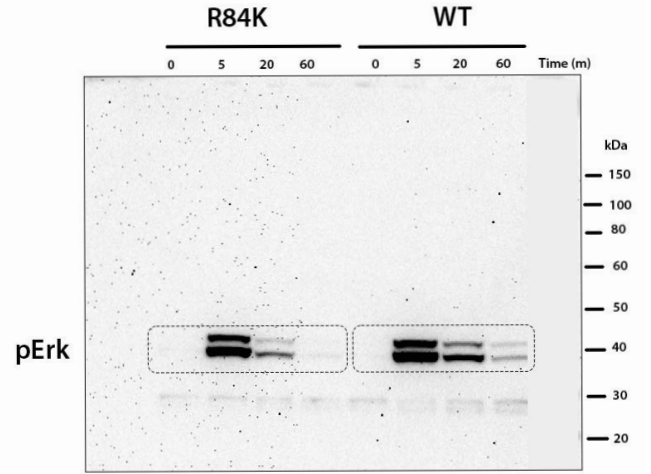



Left and right are different exposures: left with markers, right excluding markers (for detection range). Boxes represent cropped areas. Grb2 (separate gel) used as processing control.

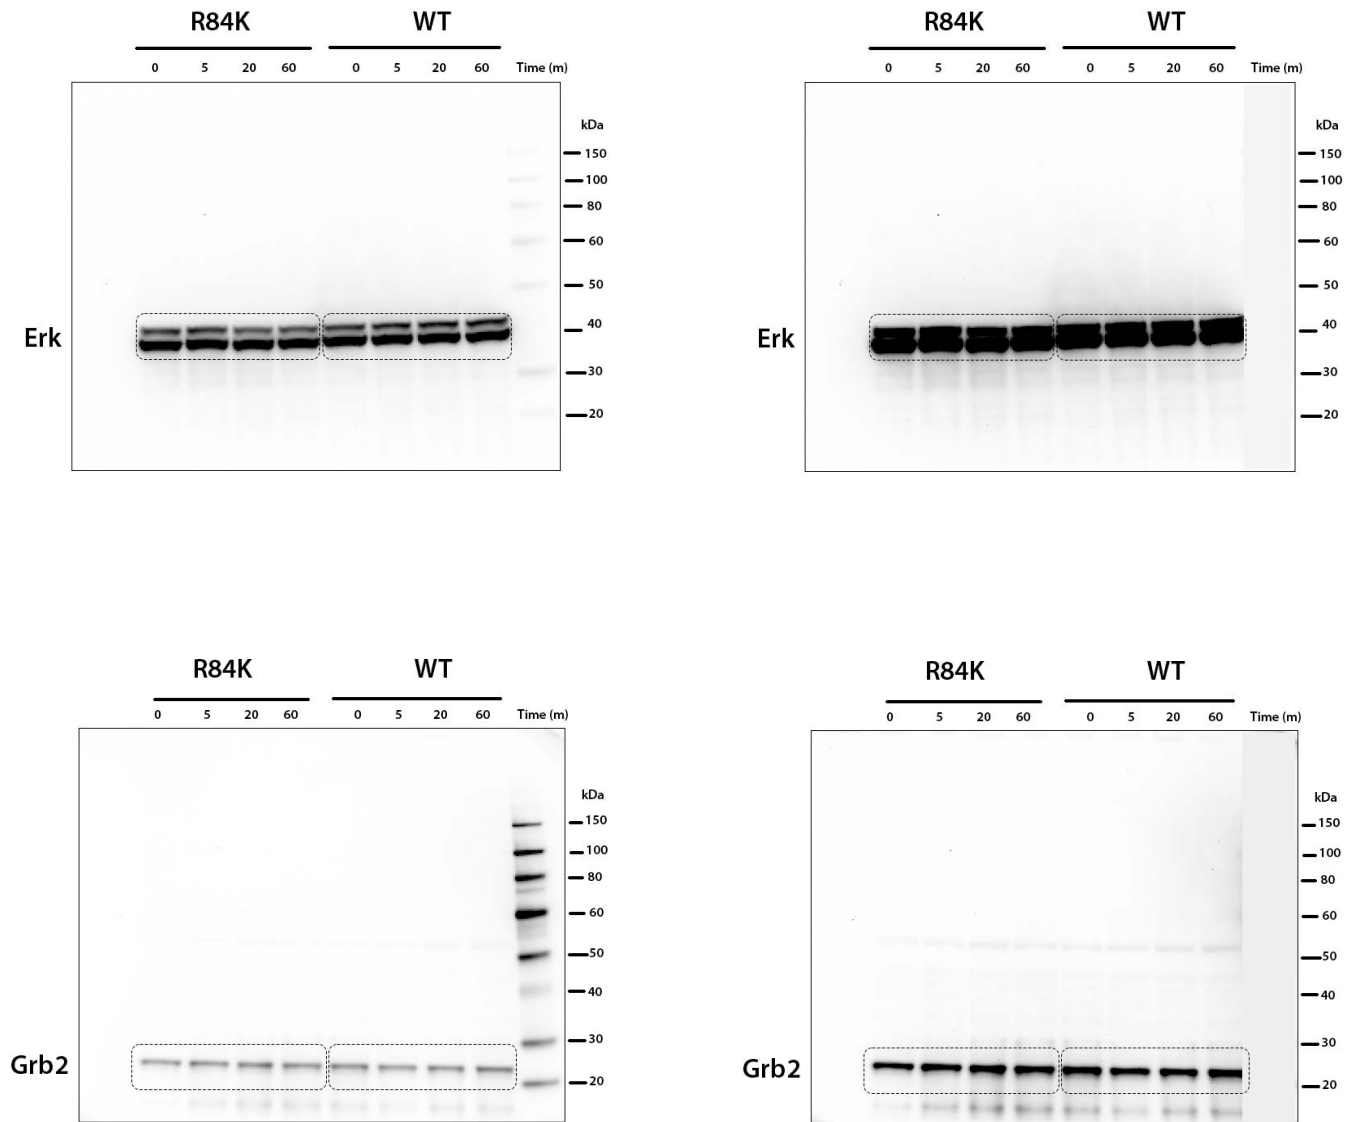

Left and right are different exposures: left with markers, right excluding markers (for detection range). Boxes represent cropped areas.

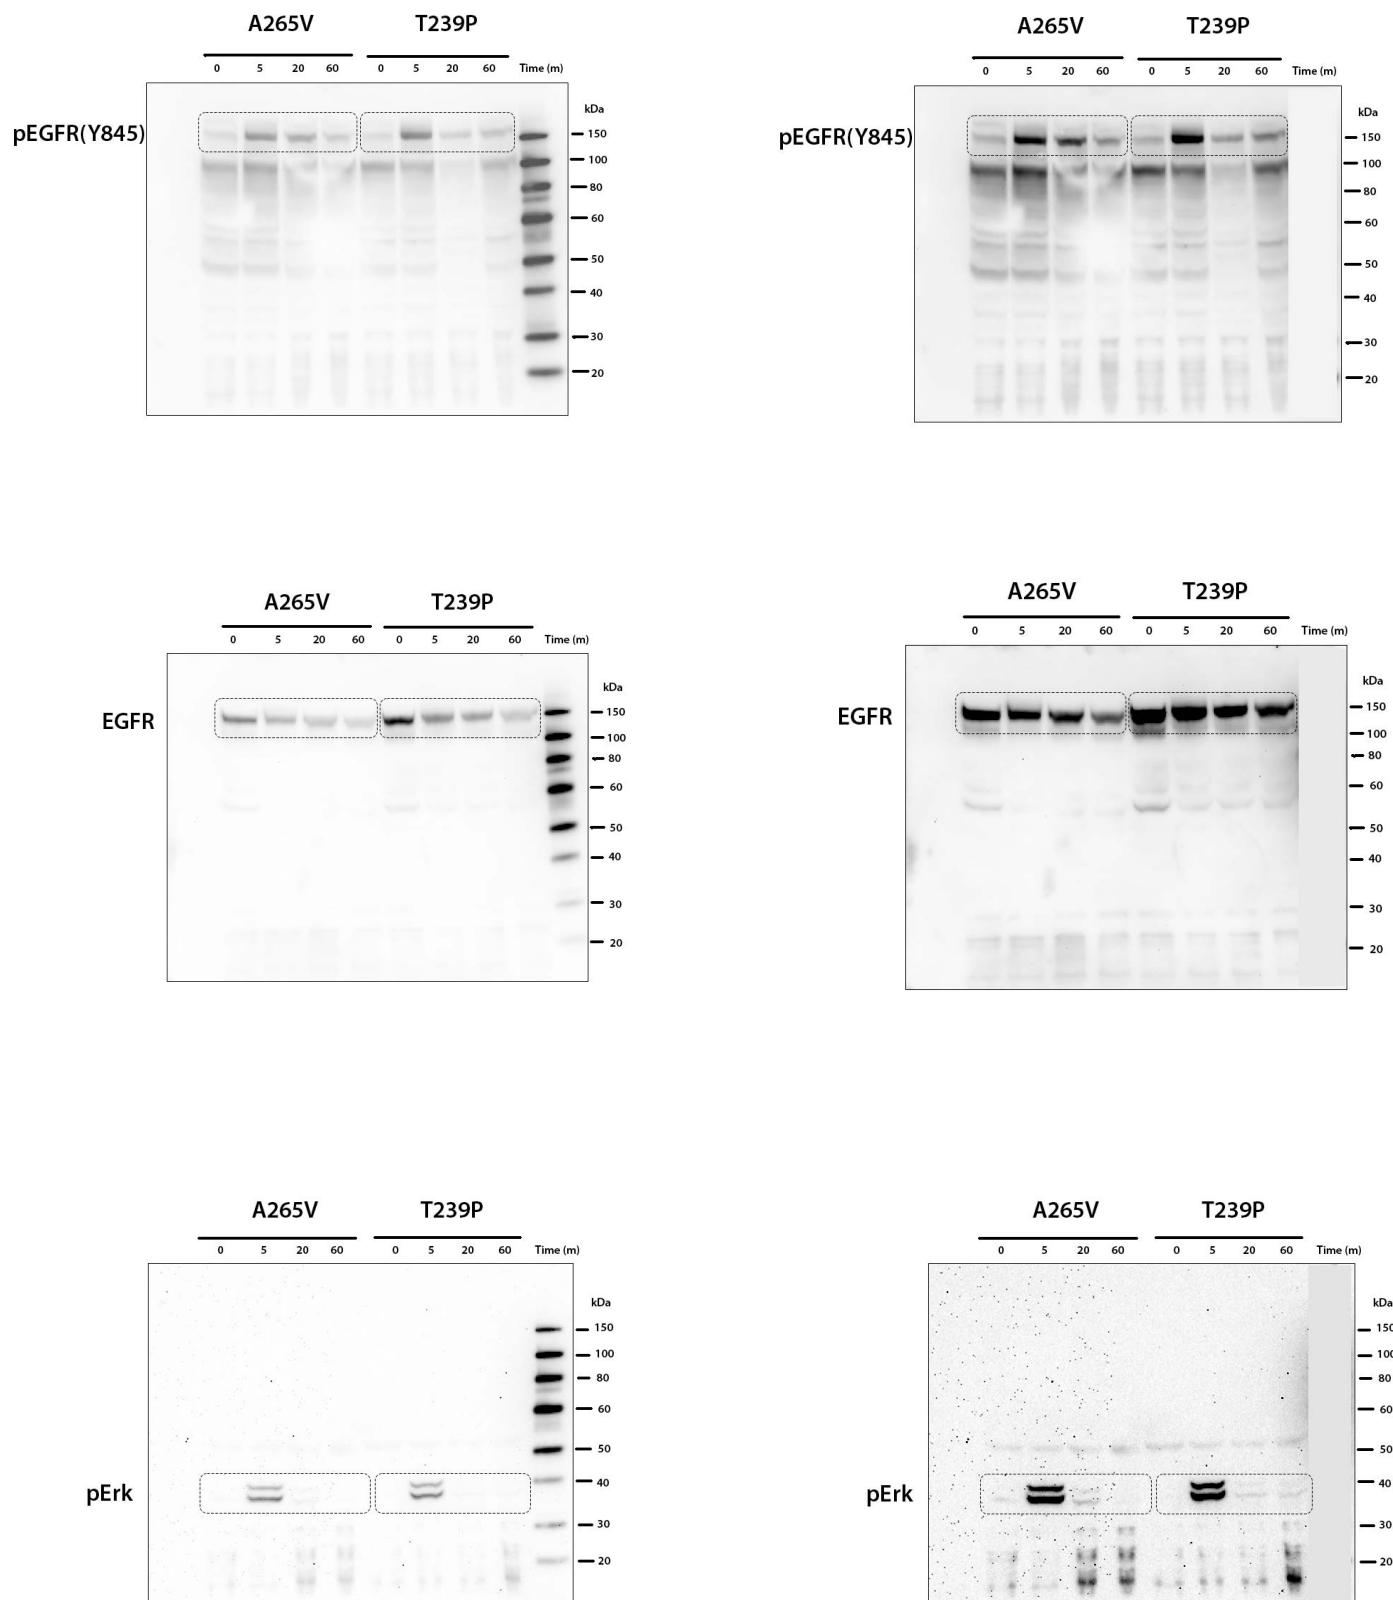

Left and right are different exposures: left with markers, right excluding markers (for detection range). Boxes represent cropped areas. Grb2 (separate gel) used as processing control.

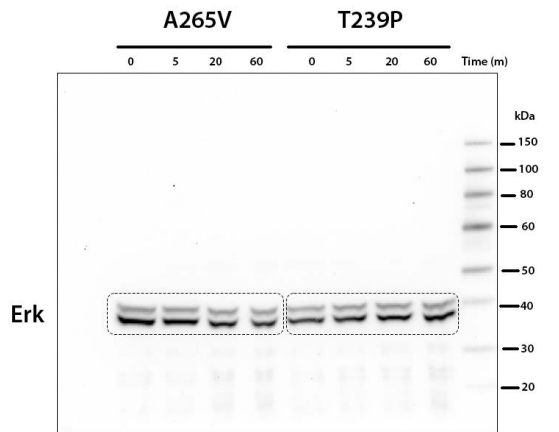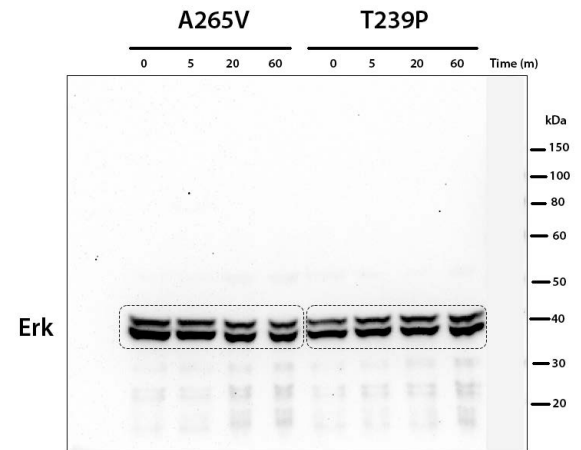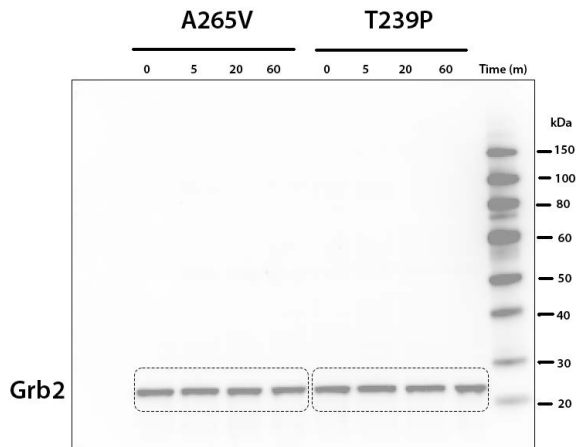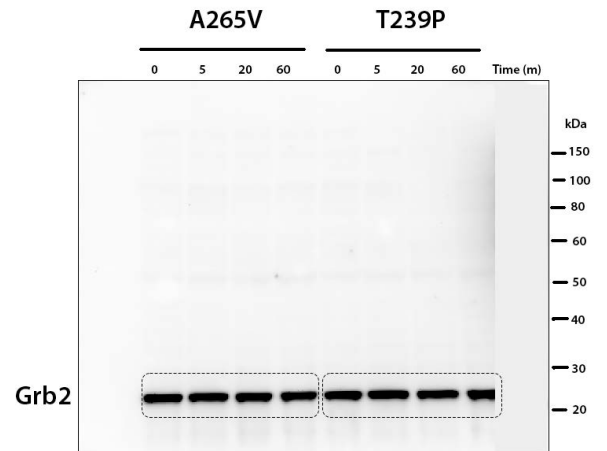

# Gel source data for Extended Data Fig. 3

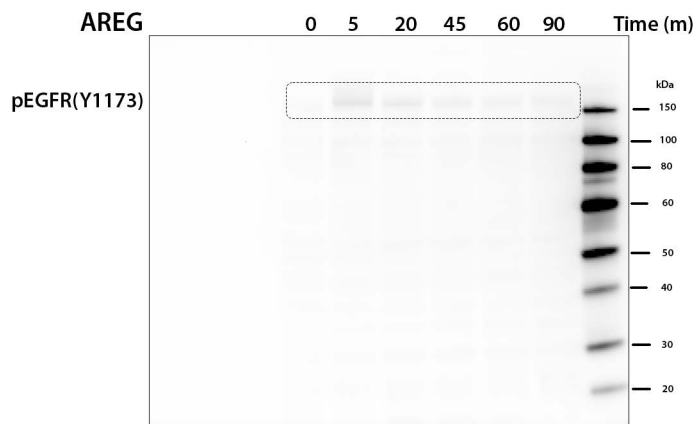

Left is lower exposure (with markers)

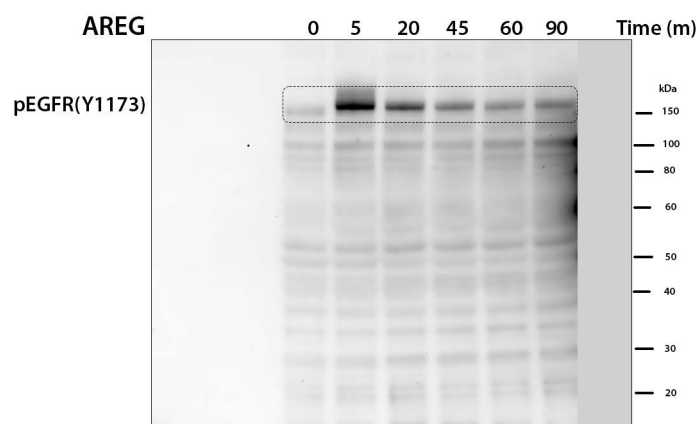

Right is higher exposure (markers removed)

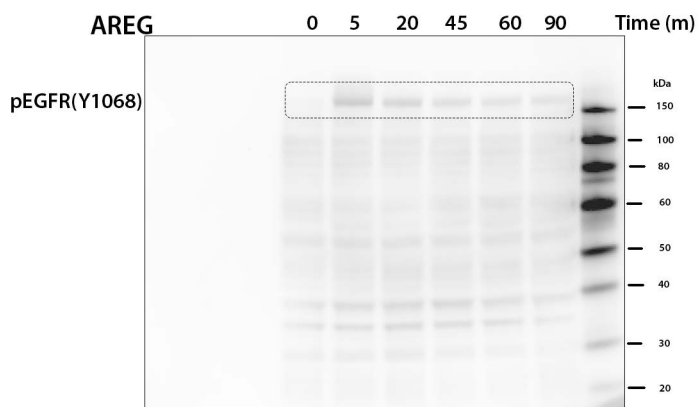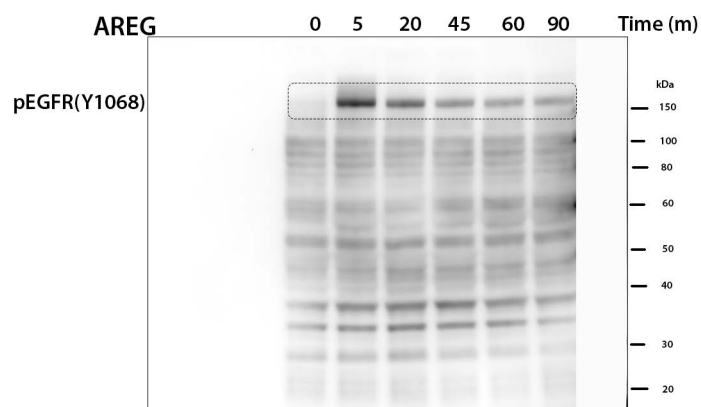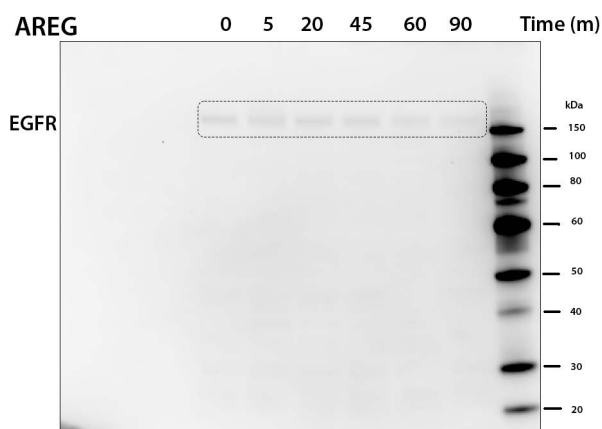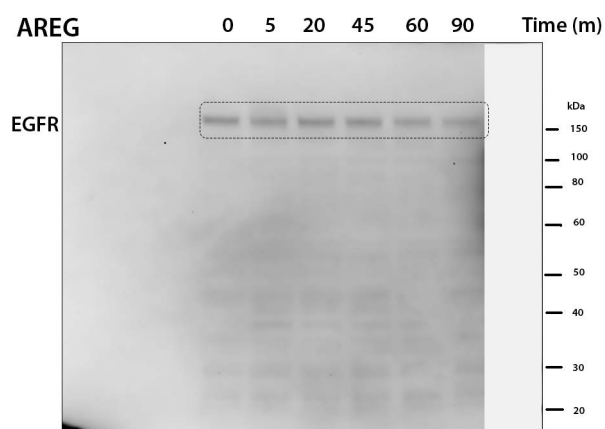

# Gel source data for Extended Data Fig. 3

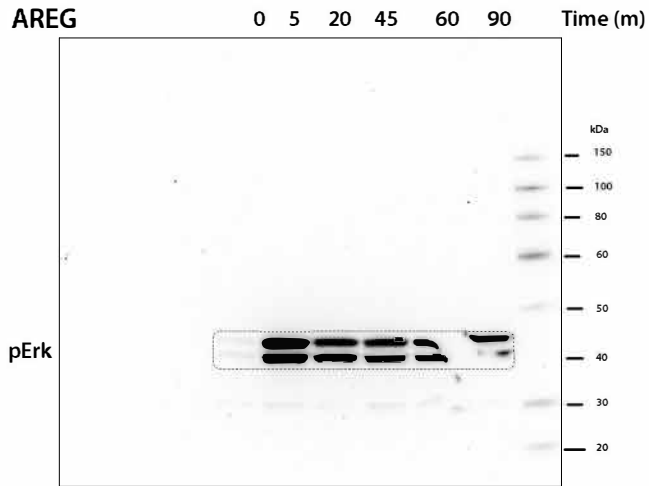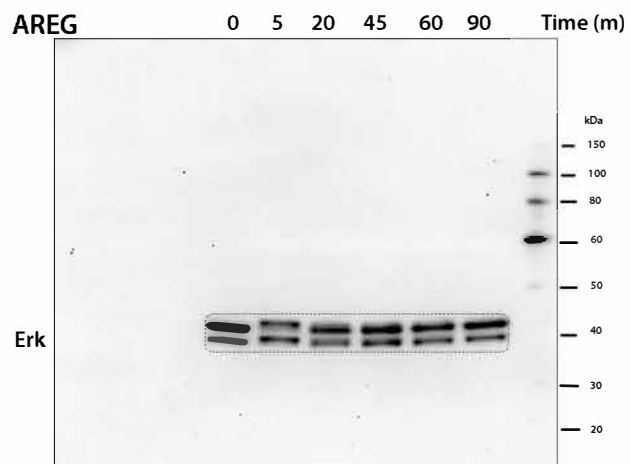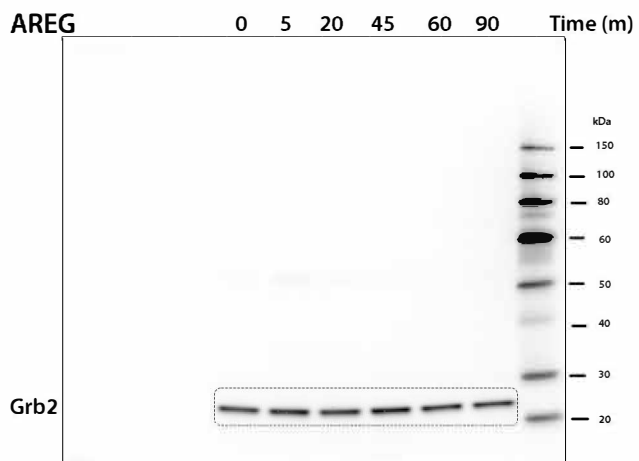

**Grb2 (separate gel) used as processing control.**

# Gel source data for Extended Data Fig. 3

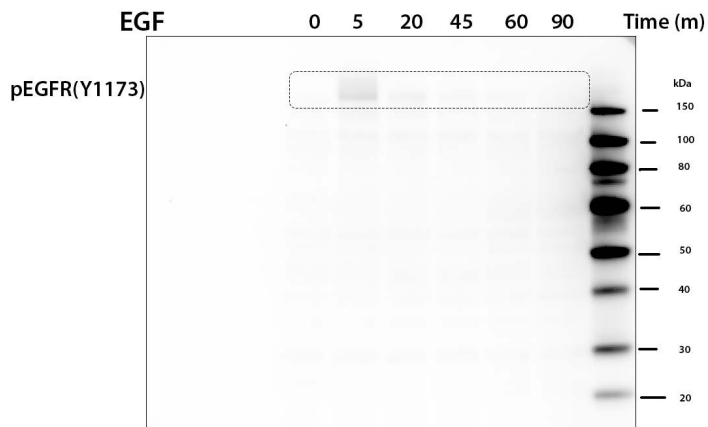

Left is lower exposure (with markers)

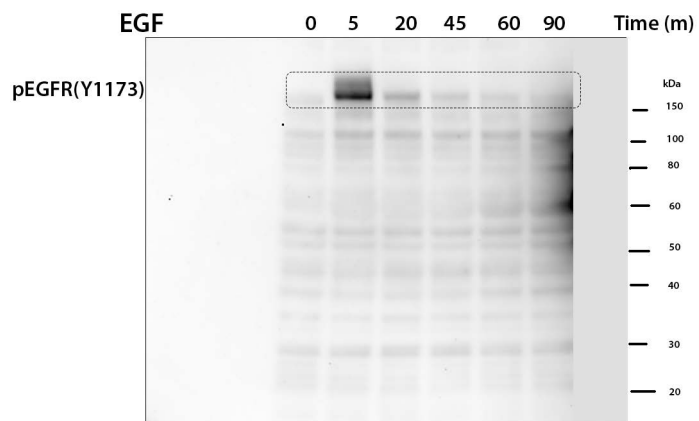

Right is higher exposure (markers removed)

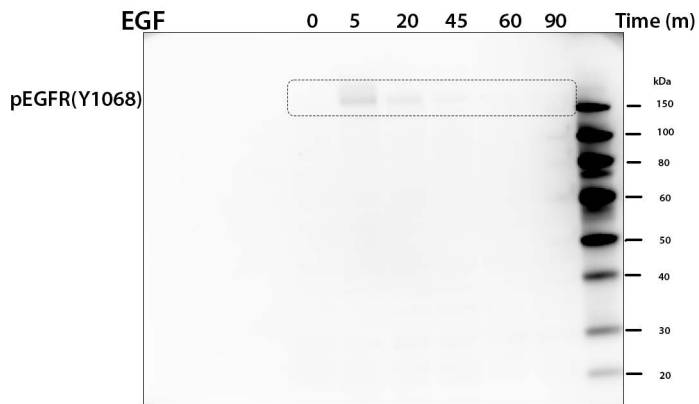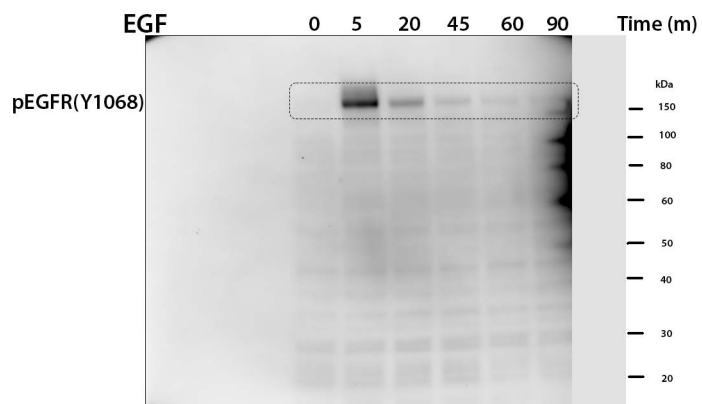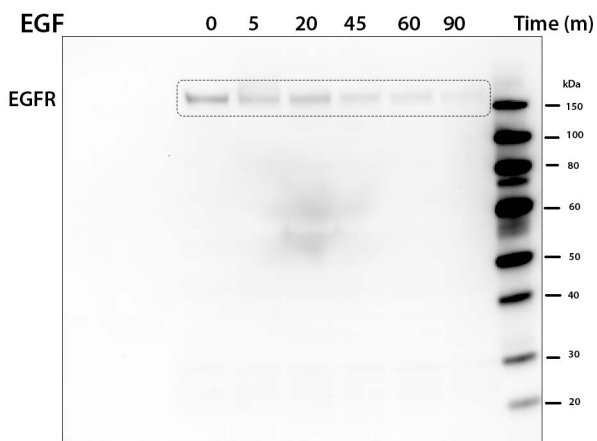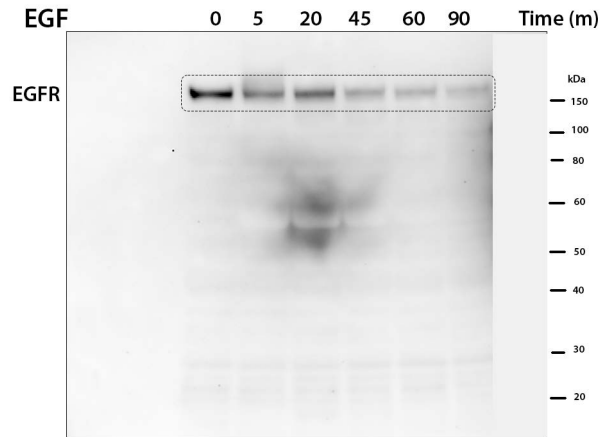

# Gel source data for Extended Data Fig. 3

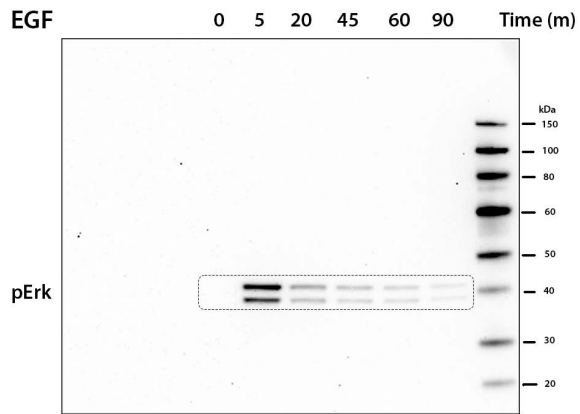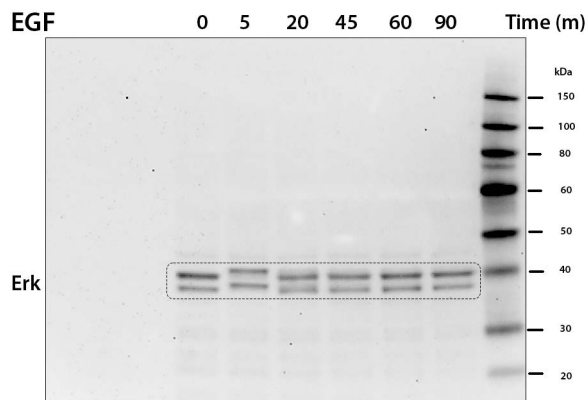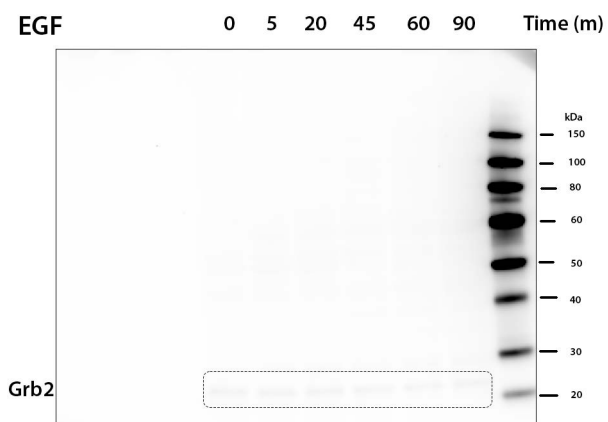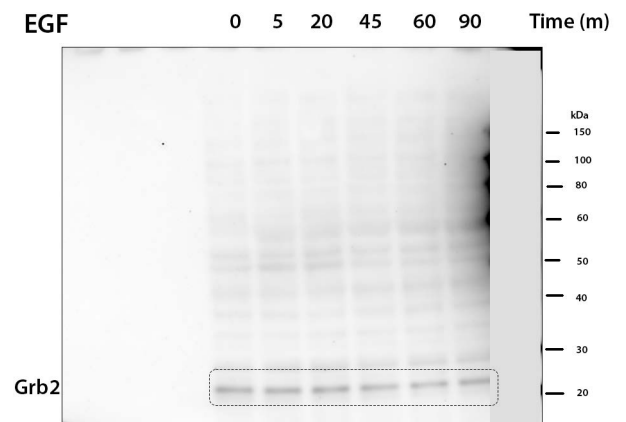

**Grb2 (separate gel) used as processing control.**
